# Supplementary material for: Transcriptome and metabolome reveal distinct carbon allocation patterns during internode sugar accumulation in different sorghum genotypes
Source: PubMed Central journal article supplement (PMC6335075; doi:10.1111/pbi.12991), 2018-09-15
Supplement: PBI-17-472-s002.pdf [file PBI-17-472-s002.pdf]

**Title:** Transcriptome and metabolome reveal distinct carbon allocation patterns during internode sugar accumulation in different sorghum genotypes.

**Authors:** Yin Li, Wenqin Wang, Yaping Feng, Min Tu, Peter E. Wittich, Nicholas J. Bate, Joachim Messing

**Running head:** transcriptome and metabolome in sorghum internode





**TableS11. Information about QTLs associated with plant height, flowering time, glucose concentration, juice volume, juice weight, non-fibrous carbohydrates and sugar contents, which were identified by previous studies.**

| Year of reference | QTL name        | chromosome | Left coordinate | Right coordinate | TYPE           | Traits                                     | Reference                                   |
|-------------------|-----------------|------------|-----------------|------------------|----------------|--------------------------------------------|---------------------------------------------|
| 2015              | FD1             | Chr02      | 8,031,702       | 20,388,713       | double markers | flowering date                             | Anne Mocoour, et al. 2015                   |
| 2015              | FD2             | Chr04      | 61,178,557      | 62,286,897       | double markers | flowering date                             | Anne Mocoour, et al. 2015                   |
| 2015              | FD3             | Chr08      | 9,515,032       | 46,796,389       | double markers | flowering date                             | Anne Mocoour, et al. 2015                   |
| 2010              | GLUC1           | Chr01      | 68,494,074      | 69,632,980       | double markers | glucose content                            | Amukelani Lacreacia Shiringani, et al. 2010 |
| 2010              | GLUC2           | Chr03      | 7,489,898       | 55,404,530       | double markers | glucose content                            | Amukelani Lacreacia Shiringani, et al. 2010 |
| 2011              | JW1             | Chr01      | 16,624,307      | 50,203,705       | double markers | juice weight                               | Yan-an Guan, et al. 2011                    |
| 2011              | JW2             | Chr01      | 50,068,342      | 50,645,315       | double markers | juice weight                               | Yan-an Guan, et al. 2011                    |
| 2011              | JW4             | Chr07      | 57,780,614      | 59,111,746       | double markers | juice weight                               | Yan-an Guan, et al. 2011                    |
| 2011              | JW5             | Chr09      | 57,312,365      | 58,975,869       | double markers | juice weight                               | Yan-an Guan, et al. 2011                    |
| 2010              | PHT1            | Chr01      | 23,702,809      | 61,146,468       | double markers | plant height                               | Amukelani Lacreacia Shiringani, et al. 2010 |
| 2010              | PHT10           | Chr08      | 46,039,745      | 48,122,969       | double markers | plant height                               | Amukelani Lacreacia Shiringani, et al. 2010 |
| 2015              | PHT11           | Chr09      | 16,146          | 2,589,508        | double markers | plant height                               | Anne Mocoour, et al. 2015                   |
| 2015              | PHT2            | Chr01      | 62,704,567      | 66,681,750       | double markers | plant height                               | Anne Mocoour, et al. 2015                   |
| 2010              | PHT3            | Chr10      | 11,029,735      | 11,037,083       | single marker  | plant height                               | Amukelani Lacreacia Shiringani, et al. 2010 |
| 2015              | PHT4            | Chr10      | 3,630,327       | 4,593,432        | double markers | plant height                               | Anne Mocoour, et al. 2015                   |
| 2010              | PHT5            | Chr04      | 48,757,775      | 51,234,749       | double markers | plant height                               | Amukelani Lacreacia Shiringani, et al. 2010 |
| 2010              | PHT6            | Chr04      | 58,537,697      | 61,178,168       | double markers | plant height                               | Amukelani Lacreacia Shiringani, et al. 2010 |
| 2015              | PHT7            | Chr04      | 57,538,106      | 58,537,974       | double markers | plant height                               | Anne Mocoour, et al. 2015                   |
| 2010              | PHT8            | Chr06      | 58,217,493      | 58,217,656       | single marker  | plant height                               | Amukelani Lacreacia Shiringani, et al. 2010 |
| 2015              | PHT9            | Chr07      | 50,339,917      | 56,155,869       | double markers | plant height                               | Anne Mocoour, et al. 2015                   |
| 2008              | SUG1            | Chr01      | 50,203,535      | 55,065,768       | double markers | sugar                                      | Kimberley B. Ritter, et al. 2008            |
| 2011              | SUG10           | Chr03      | 7,489,898       | 52,308,712       | double markers | sugar                                      | Yan-an Guan, et al. 2011                    |
| 2002              | SUG11           | Chr04      | 51,234,586      | 67,894,310       | double markers | sugar                                      | A. Natoli, et al. 2002                      |
| 2010              | SUG12           | Chr04      | 58,537,697      | 58,537,974       | single marker  | sugar                                      | Amukelani Lacreacia Shiringani, et al. 2010 |
| 2015              | SUG13           | Chr04      | 51,875,816      | 55,385,999       | double markers | sugar                                      | Anne Mocoour, et al. 2015                   |
| 2002              | SUG14           | Chr05      | 5,686,170       | 11,099,019       | double markers | sugar                                      | A. Natoli, et al. 2002                      |
| 2008              | SUG15           | Chr05      | 1,907,420       | 11,099,019       | double markers | sugar                                      | Kimberley B. Ritter, et al. 2008            |
| 2010              | SUG16           | Chr06      | 58,217,493      | 58,217,656       | single marker  | sugar                                      | Amukelani Lacreacia Shiringani, et al. 2010 |
| 2015              | SUG17           | Chr06      | 1,822,330       | 1,908,756        | double markers | sugar                                      | Anne Mocoour, et al. 2015                   |
| 2011              | SUG18           | Chr07      | 57,780,614      | 59,111,746       | double markers | sugar                                      | Yan-an Guan, et al. 2011                    |
| 2008              | SUG19           | Chr08      | 45,992,122      | 50,413,945       | double markers | sugar                                      | Kimberley B. Ritter, et al. 2008            |
| 2010              | SUG2            | Chr01      | 50,608,251      | 50,608,477       | single marker  | sugar                                      | Amukelani Lacreacia Shiringani, et al. 2010 |
| 2010              | SUG20           | Chr08      | 48,122,810      | 50,414,003       | double markers | sugar                                      | Amukelani Lacreacia Shiringani, et al. 2010 |
| 2010              | SUG21           | Chr08      | 46,039,745      | 48,122,969       | double markers | sugar                                      | Amukelani Lacreacia Shiringani, et al. 2010 |
| 2015              | SUG22           | Chr08      | 1,553,582       | 1,971,577        | double markers | sugar                                      | Anne Mocoour, et al. 2015                   |
| 2011              | SUG3            | Chr01      | 50,068,342      | 50,645,315       | double markers | sugar                                      | Yan-an Guan, et al. 2011                    |
| 2011              | SUG4            | Chr01      | 55,721,520      | 58,712,796       | double markers | sugar                                      | Yan-an Guan, et al. 2011                    |
| 2010              | SUG5            | Chr10      | 11,036,814      | 47,161,323       | double markers | sugar                                      | Amukelani Lacreacia Shiringani, et al. 2010 |
| 2002              | SUG6            | Chr02      | 5,700,033       | 61,503,893       | double markers | sugar                                      | A. Natoli, et al. 2002                      |
| 2010              | SUG7            | Chr02      | 61,887,961      | 61,888,140       | single marker  | sugar                                      | Amukelani Lacreacia Shiringani, et al. 2010 |
| 2010              | SUG8            | Chr02      | 5,076,675       | 13,161,221       | double markers | sugar                                      | Amukelani Lacreacia Shiringani, et al. 2010 |
| 2011              | SUG9            | Chr02      | 40,504,003      | 60,421,867       | double markers | sugar                                      | Yan-an Guan, et al. 2011                    |
| 2016              | NFC1_2016_chr04 | Chr04      | 63,201,409      | 63,401,429       | GWAS           | n-fibrous carbohydrates (NF <sup>0</sup> ) | Brenton et al. 2016                         |
| 2016              | NFC2_2016_chr04 | Chr04      | 63,247,613      | 63,447,623       | GWAS           | n-fibrous carbohydrates (NF <sup>0</sup> ) | Brenton et al. 2016                         |
| 2015              | JV_2015_chr06   | Chr06      | 51,666,559      | 51,901,476       | GWAS           | Juice volume                               | Burks et al. 2015                           |
| 2016              | NFC3_2016_chr06 | Chr06      | 4,220,818       | 4,430,906        | GWAS           | n-fibrous carbohydrates (NF <sup>0</sup> ) | Brenton et al. 2016                         |
| 2016              | NFC4_2016_chr06 | Chr06      | 49,673,083      | 49,884,457       | GWAS           | n-fibrous carbohydrates (NF <sup>0</sup> ) | Brenton et al. 2016                         |
